# Supplementary material for: Differential effect of micron- versus nanoscale III–V particulates and ionic species on the zebrafish gut
Source: Royal Society of Chemistry journal article supplement (doi:10.1039/c6en00675b), 2017-01-01
Supplement: c6en00675b1.pdf [file c6en00675b1.pdf]

## Supporting Information

### Differential Effect of Micron- *versus* Nanoscale III-V Particulates and Ionic Species on the Zebrafish Gut

*Olivia J. Osborne<sup>†</sup>, Sijie Lin<sup>◇†</sup>, Wen Jiang<sup>†</sup>, Jacob Chow<sup>†</sup>, Chong Hyun Chang<sup>†</sup>, Zhaoxia Ji<sup>†</sup>, Xuechen Yu<sup>†</sup>, Shuo Lin<sup>‡</sup>, Tian Xia<sup>#†</sup> and André E. Nel<sup>#†\*</sup>*

<sup>†</sup>Center for Environmental Implications of Nanotechnology, California NanoSystems Institute, University of California, Los Angeles, Los Angeles, CA;

<sup>◇</sup>College of Environmental Science and Engineering State Key Laboratory of Pollution Control and Resource Reuse, Tongji University, Shanghai, China, 200092;

<sup>‡</sup>Department of Molecular, Cell, and Developmental Biology, University of California, Los Angeles, Los Angeles, CA;

<sup>#</sup>Department of Medicine, Division of NanoMedicine, UCLA School of Medicine, 52-175 CHS, 10833 Le Conte Ave, Los Angeles, CA

*\*Corresponding Author:*

*André E. Nel, M.D., Department of Medicine, Division of NanoMedicine, UCLA School of Medicine, 52-175 CHS, 10833 Le Conte Ave, Los Angeles, CA 90095-1680.*

*Tel: (310) 825-6620, Fax: (310) 206-8107*

*E-mail: [anel@mednet.ucla.edu](mailto:anel@mednet.ucla.edu)*

## Supporting Information Contents:

Schematic S1. Study plan for elucidating the effect of III-V materials on biological outcomes during zebrafish development.

Schematic S2. Experimental plan for larval screening, using pulse exposures. Zebrafish larvae at 5 dpf were incubated with III-V material suspensions in Petri dishes.

Schematic S3. Schematic to show the experimental layout for adult exposure.

Schematic S4. Schematic to show the III-V materials toxicity mechanism.

Table S1: Physicochemical characterization of the particulate III-V material library

Table S2: Characterisation of III-V materials in Holtfreter's Medium at  $t=4$  hours and simulated intestinal fluid at  $t=120$  hours.

Table S3: Statistical analysis to show the percentage ratio release of As (III) and As (V) in HM from  $\mu\text{m}$  GaAs, nm-GaAs,  $\mu\text{m}$  InAs, nm-InAs at 200 ppm (exposure concentration) over 4 hours (time exposure period)

Figure S1. Physicochemical characterization of III-V particulates in HM.

Figure S2. Statistical analysis of survival and hatching rate interference (expressed as a percent of the number of starting embryos) using HTS embryo screening in response to  $\text{InCl}_3$  and  $\text{GaCl}_3$ .

Figure S3. Statistical analysis of survival and hatching rate interference using HTS embryo screening in response to pH'd  $\text{InCl}_3$  and  $\text{GaCl}_3$ .

Figure S4. Statistical analysis of the comparative interference of embryo survival and hatching in response to  $\text{Na}_2\text{HAsO}_4$  and  $\text{NaAsO}_2$ .

Figure S5. The representative four-quadrant high content images of zebrafish embryos exposed to 200 ppm for each of III-V particulates micron and nano (InAs, GaAs, InP, GaP).

Figure S6. Graph to show the dosimetry analysis of nm-InAs in larvae at concentrations of: 25, 50, 100, 200 and 400ppm.

Figure S7. Statistical analysis to illustrate the amount ( $\mu\text{g/g}$ ) of As detected *via* ICP-OES in the body of the larvae ( $n=60$  for each treatment group) at 4 hours (after 4 hour exposure to  $\text{NaAsO}_2$ , nm-InAs and  $\mu\text{m}$ -InAs) and at 28 hours (after an additional 24 hour depuration period).

Figure S8. Graph to show the dosimetry analysis showing the percentage of fish alive  $n=6$  per treatment group after a 4 day adult exposure. 0.5, 1, 5, 20 ppm

Figure S9. Graph to show the dosimetry analysis showing the percentage of fish alive after a 4 day adult exposure.

Number of Schematics: 4

Number of Tables: 3

Number of Figures: 9

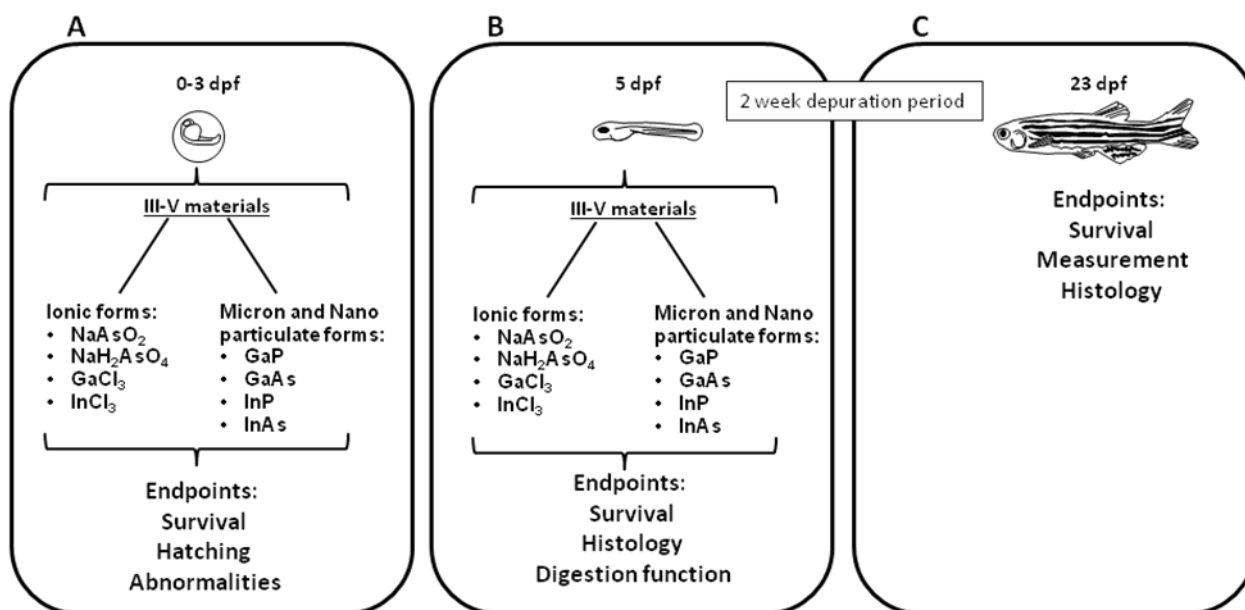

**Schematic S1.** Study plan for elucidating the effect of III-V materials on biological outcomes during zebrafish development. (A) High throughput screening of the toxicological potential of nano- and micronscale GaP, GaAs, InP, and InAs particulates, as well as representative ionic forms ( $\text{NaAsO}_2$ ,  $\text{NaH}_2\text{AsO}_4$ ,  $\text{GaCl}_3$ ,  $\text{InCl}_3$ ) in zebrafish embryos up to 3 dpf. The measured endpoints were survival, hatching interference and morphological abnormalities. (B) Pulse-exposure of zebrafish larvae to III-V materials to assess the effects of oral ingestion of the same materials (a schematic for the pulse-exposure protocol is shown in Schematic 2). The endpoints measured at 5, 7 and 9 dpf included intestinal histology, survival rate and use of an enzymatic assay for digestive function (only at 5dpf). (C) After a 2 week depuration period from the same batch of larvae included in (B), the overall health status was assessed by survival rate, body length and intestinal histology.

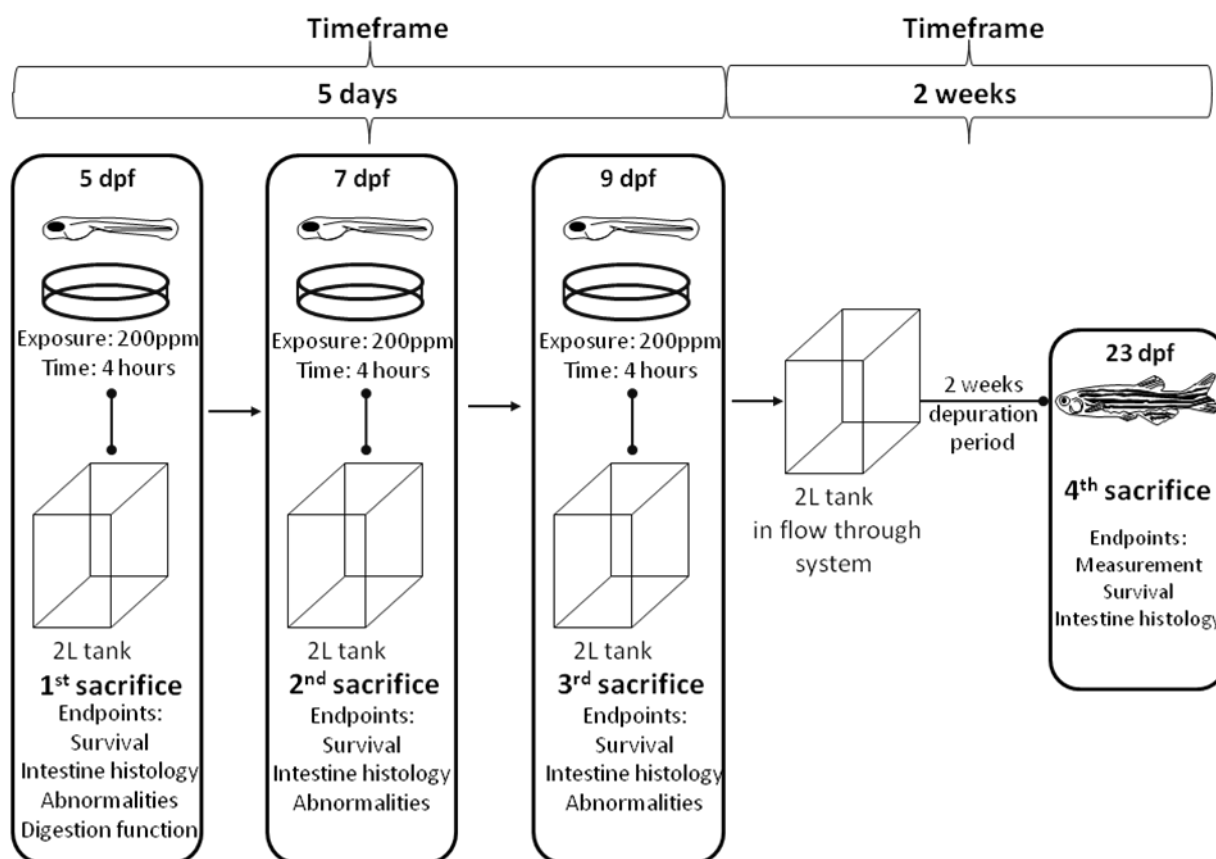

**Schematic S2.** Experimental plan for larval screening, using pulse exposures. Zebrafish larvae at 5 dpf were incubated with III-V material suspensions in Petri dishes. Thirty larvae were exposed on each occasion to III-V particulates and ionic forms at 200 ppm for 4 h. The larvae were then carefully and thoroughly washed before returning to standard aquarium tanks for regular feeding and water circulation. The same batch of larvae was used for a secondary and a tertiary exposure at 7 and 9 dpf. The endpoints included survival and intestinal histology. After the tertiary exposure and 14 days depuration, the larvae were assessed on 23 dpf for survival, growth, body length and histological analysis of the intestines.

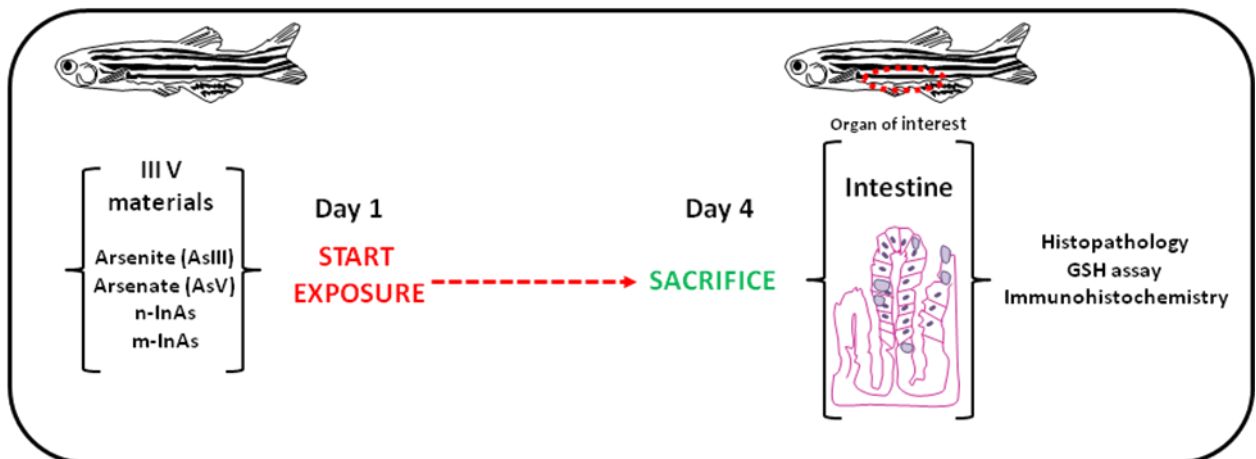

**Schematic S3.** Schematic to show the experimental layout for adult exposure. There were 4 treatment groups (n-InAs, m-InAs, Arsenite (AsIII), Arsenate (AsV)) and one control  $n=6$ . Zebrafish were exposed on Day 1 with the treatment groups at different concentrations. On Day 4 the fish were sacrificed and the organ of interest: the intestine was isolated.

**Schematic S4.** Schematic to show the III-V materials toxicity mechanism.

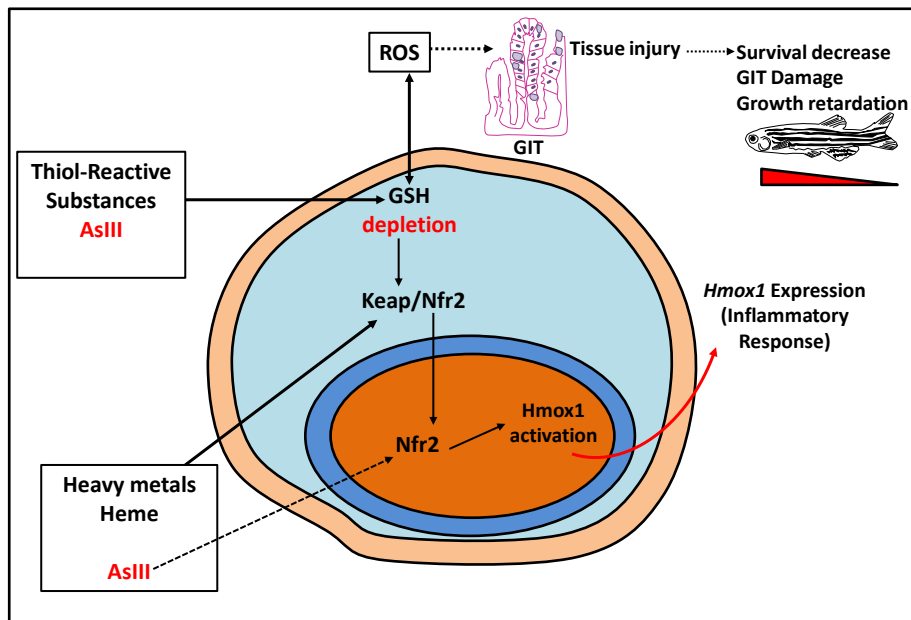

**Table S1.** Physicochemical characterization of the particulate III-V material library\*

| SRM Properties                           | Technique                      | Unit  | Micron-size Particles |               |              |               | Nano-size Particles |               |              |               |
|------------------------------------------|--------------------------------|-------|-----------------------|---------------|--------------|---------------|---------------------|---------------|--------------|---------------|
|                                          |                                |       | m-GaP                 | m-GaAs        | m-InP        | m-InAs        | n-GaP               | n-GaAs        | n-InP        | n-InAs        |
| Primary Size                             | TEM                            | nm    | 100-3000              | 200-700       | 200-1100     | 100-650       | ~10                 | <10           | ~10          | 20-200        |
| Phase & Structure                        | XRD                            |       | Cubic<br>GaP          | Cubic<br>GaAs | Cubic<br>InP | Cubic<br>InAs | Cubic<br>GaP        | Cubic<br>GaAs | Cubic<br>InP | Cubic<br>InAs |
| Shape/<br>Morphology                     | TEM                            |       | Irregular             | Irregular     | Irregular    | Irregular     | Sphere              | Irregular     | Sphere       | Irregular     |
| Size in DI H <sub>2</sub> O              | HT-DLS                         | nm    | 442.3 ± 29.6          | 342.9 ± 5.2   | 246.3 ± 6.6  | 301.7 ± 7.2   | 450.2 ± 12.4        | 503.3 ± 13.2  | 290.1 ± 26.9 | 186.1 ± 2.5   |
| Zeta Potential<br>in DI H <sub>2</sub> O | ZetaPALS                       | mV    | -11.0 ± 2.1           | -24.2 ± 1.5   | 6.6 ± 0.6    | -11.9 ± 1.1   | -8.0 ± 1.3          | -13.3 ± 1.2   | -10.0 ± 1.0  | -3.3 ± 1.2    |
| Endotoxin <sup>a</sup>                   | Limulus<br>Amebocyte<br>Lysate | EU/mL | < 0.153               | < 0.324       | < 0.098      | < 0.246       | < 0.215             | < 0.136       | < 0.233      | < 0.273       |

<sup>a</sup>The endotoxin levels of all the particles were less than the detection threshold (<2.5 EU/mL) in the Limulus Amebocyte Lysate assay kit (Lonza, Walkersville, MD).

\*Jiang, W. et al *ACS Nano* **2015**, 9 (12), 12011-12025.



| NPs          | HM<br>4hrs    |             |                        | SIF<br>120hrs |             |                        |
|--------------|---------------|-------------|------------------------|---------------|-------------|------------------------|
|              | dH(nm)        | PDI         | $\zeta$ potential (mV) | dH(nm)        | PDI         | $\zeta$ potential (mV) |
| nm-InAs      | 1145.9±28.8   | 0.358±0.022 | -11.20±3.37            | 1746.71±119.3 | 0.362±0.022 | -21.49±2.72            |
| $\mu$ m-InAs | 1618.7±61.9   | 0.363±0.068 | -23.01±1.17            | 1255.0±136.1  | 0.243±0.014 | -28.70±1.60            |
| nm-GaAs      | 1800.5±446.8  | 0.376±0.040 | -11.32±2.59            | 1349.5±18.5   | 0.236±0.019 | -18.08±1.75            |
| $\mu$ m-GaAs | 4747.8±1428.7 | 0.374±0.034 | -16.71±0.16            | 3003.6±557.1  | 0.389±0.024 | -27.41±2.64            |

**Table S2** : Characterisation of III-V materials (InAs/GaAs particulates) in Holtfreter's Medium at  $t=4$ hours and simulated intestinal fluid at  $t=120$  hours.

|               | As (III) | As (V) |
|---------------|----------|--------|
|               | %        |        |
| $\mu$ m -GaAs | 95.1     | 4.9    |
| nm-GaAs       | 100.0    | 0.0    |
| $\mu$ m -InAs | 89.1     | 10.9   |
| nm-InAs       | 80.7     | 19.3   |

**Table S3.** Statistical analysis to show the percentage release of AsIII and AsV in HM from  $\mu$ m GaAs, nm-GaAs,  $\mu$ m InAs, nm-InAs at 200 ppm over 4 hours. Using disposable cartridges<sup>1</sup> for fractioning we estimated the percentage release of As from the particulates. As analysis detected *via* ICP-OES revealed that the trivalent form (III) was detected at a much higher percentage than the pentavalent form (V).

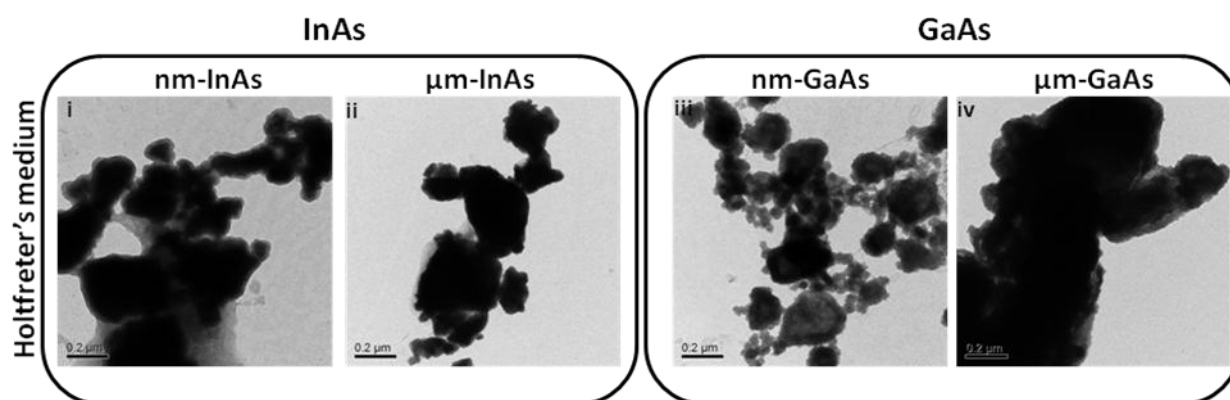

**Figure S1.** Physicochemical characterization of III-V particulates in HM. Representative TEM images were obtained at  $t= 4$  hours to show the primary size, shape, and state of agglomeration. (i) nm-InAs; (ii)  $\mu\text{m}$  m-InAs; (iii) nm-GaAs; (iv)  $\mu\text{m}$ -GaAs.

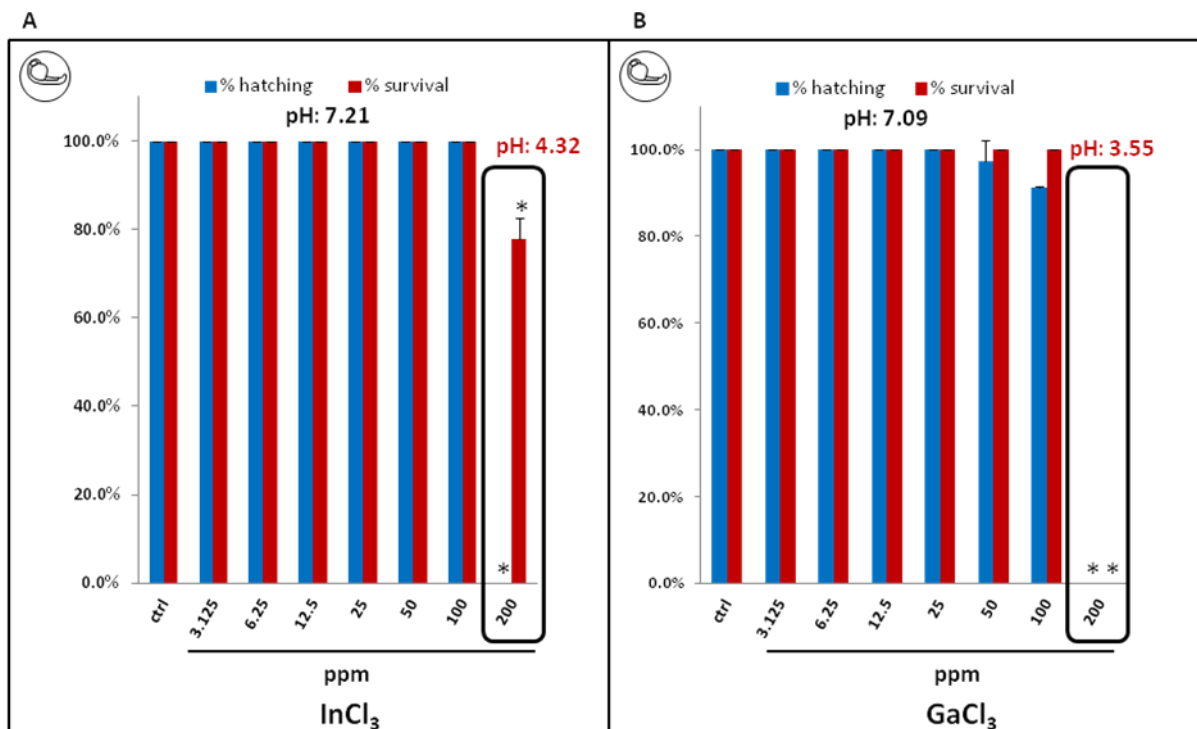

**Figure S2.** Statistical analysis of the survival and hatching rate interference (expressed as a percent of the number of starting embryos) using HTS embryo screening in response to InCl<sub>3</sub> (A) and GaCl<sub>3</sub> (B). The % interference in survival and hatching by InCl<sub>3</sub> and GaCl<sub>3</sub> was statistically significant (\*p<0.05) compared to the control at 200 ppm and above. Both InCl<sub>3</sub> and GaCl<sub>3</sub> are considered as Lewis acids, implying that both compounds become acidic in solution, precipitating an abrupt pH change ~200 ppm (InCl<sub>3</sub> has a pH=4.32 and GaCl<sub>3</sub> a pH =3.55). HM do not contain any buffers.

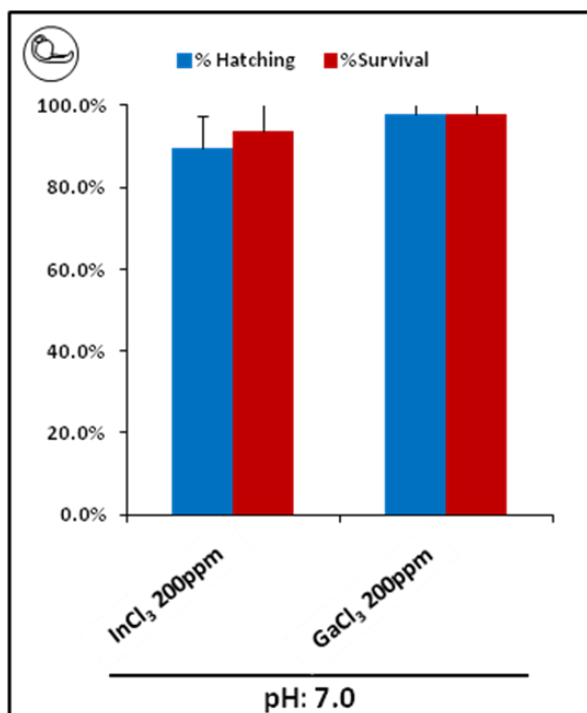

**Figure S3.** The addition of NaOH to restore the pH to 7 to a statistically significant improvement in survival and hatching during embryo exposure to InCl<sub>3</sub> and GaCl<sub>3</sub>.

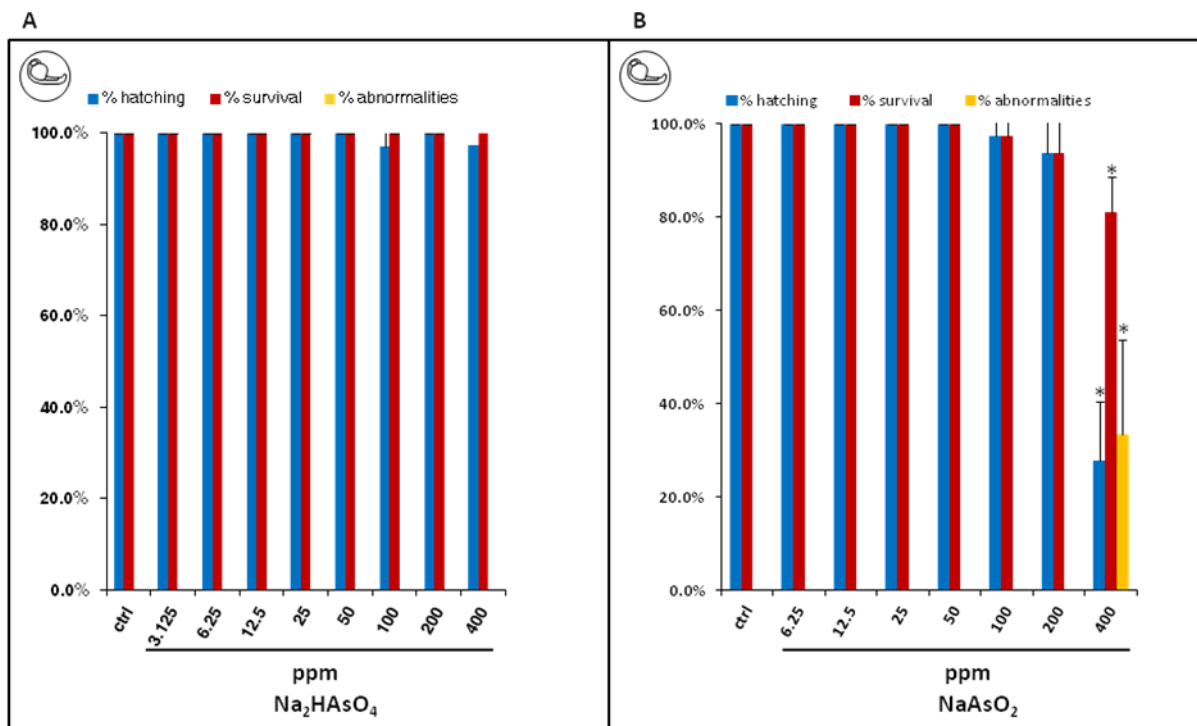

**Figure S4.** Statistical analysis of the comparative interference of embryo survival and hatching in response to Na<sub>2</sub>HAsO<sub>4</sub> (A) and NaAsO<sub>2</sub> (B). The impact of NaAsO<sub>2</sub> on survival, hatching and morphological abnormalities was significantly different from Na<sub>2</sub>HAsO<sub>4</sub> (\*p<0.05). NaAsO<sub>2</sub> caused significantly more severe effects at 400ppm and above. Na<sub>2</sub>HAsO<sub>4</sub> was devoid of these effects up to 400ppm.

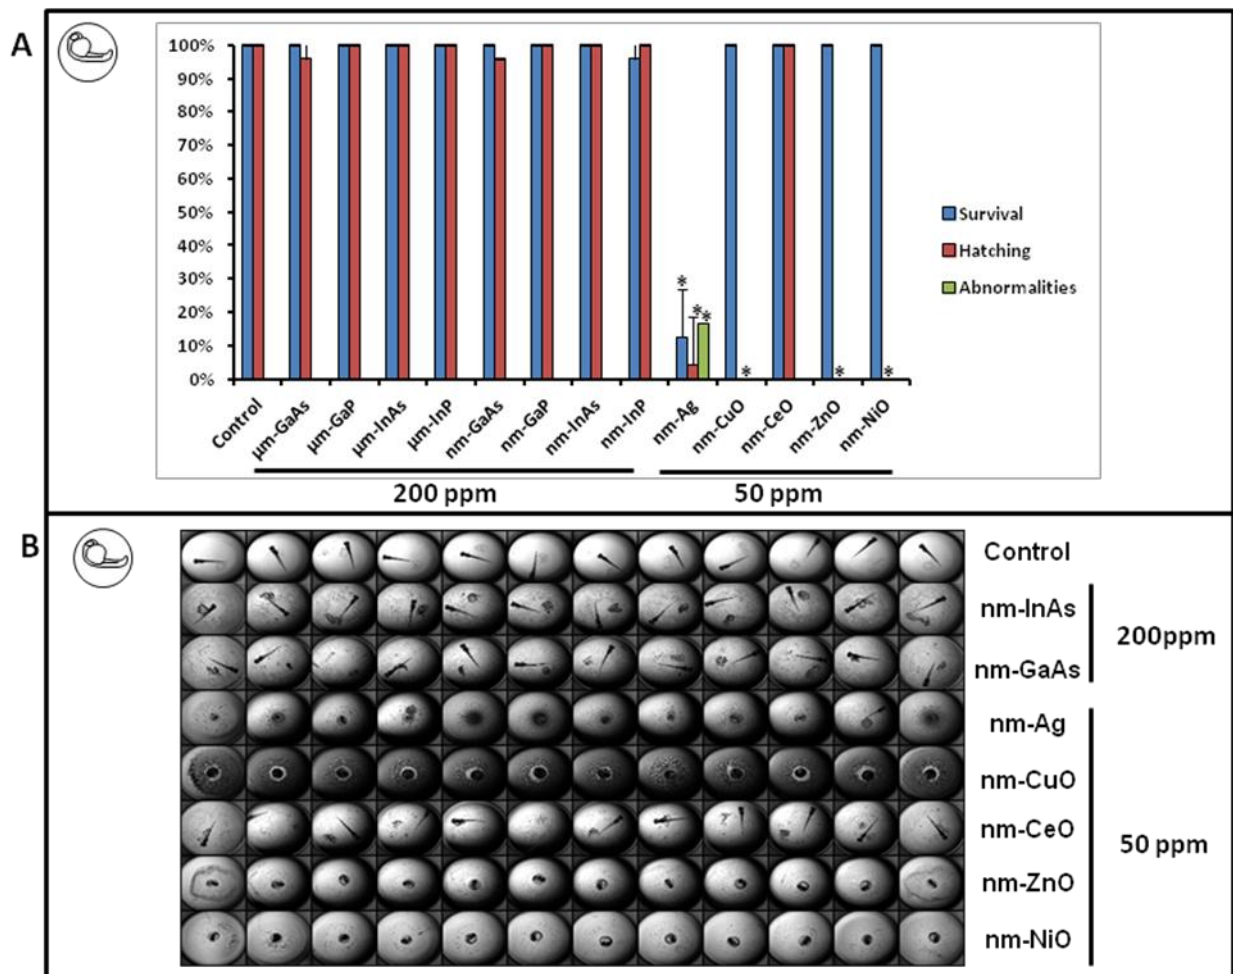

**Figure S5.** (A) Statistical analysis of survival rate, hatching interference and abnormalities during embryo screening in response to exposure to III-V particulates. These particulates did not exert any observable toxicity up to 200 ppm, in contradistinction to positive control, nano-Ag and metal oxide (nm-CuO, nm-ZnO, nm-NiO) nanoparticles, used at 50 ppm. nm-CeO<sub>2</sub>, used at the same concentration, was included as a negative control. Dissolution of nano-Cu, Zn and Ni interferes with the hatching enzyme, ZHE1, while nano-Ag has a hatching interference effect through embryonal lethality. Average  $\pm$  SE, \* denotes  $p < 0.05$  (B) Representative high content images of zebrafish embryos exposed to III-V particulates (nm-InAs/nm-GaAs) at 200 ppm, in comparison to the same positive and negative control particles as in A (50 ppm). Automated bright-field imaging at 3 dpf demonstrates III-V micron and nano particulates at 200 ppm didn't exert effects on survival, hatching or abnormalities in zebrafish embryos.

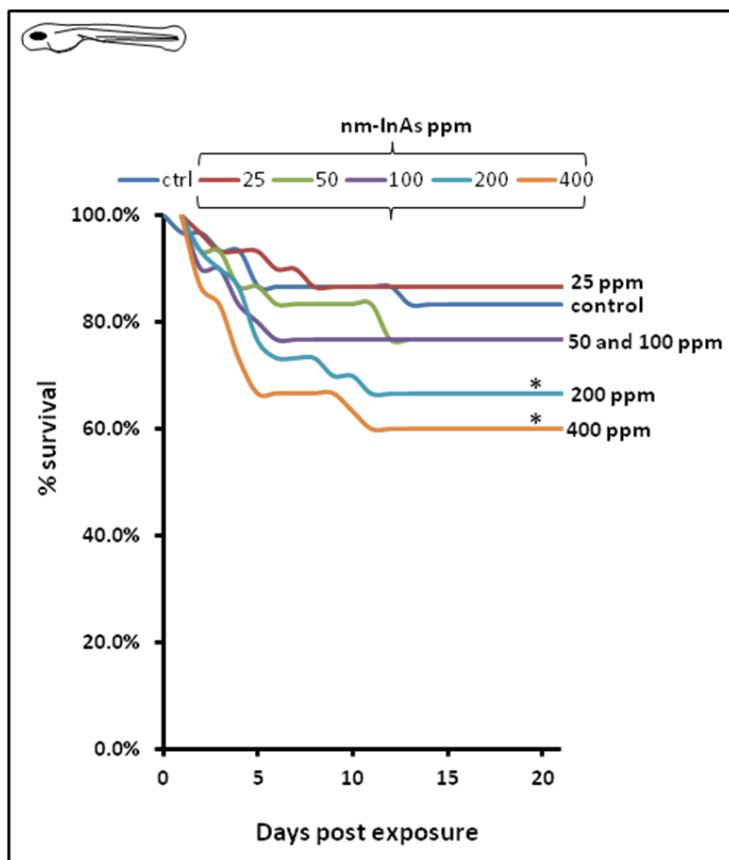

**Figure S6.** Graph to show the dosimetry analysis of nm-InAs in larvae at concentrations of: 25, 50, 100, 200 and 400ppm. At 200ppm and above nm-InAs exerted a significant (\* $p < 0.05$ ) decrease in survival compared to control.

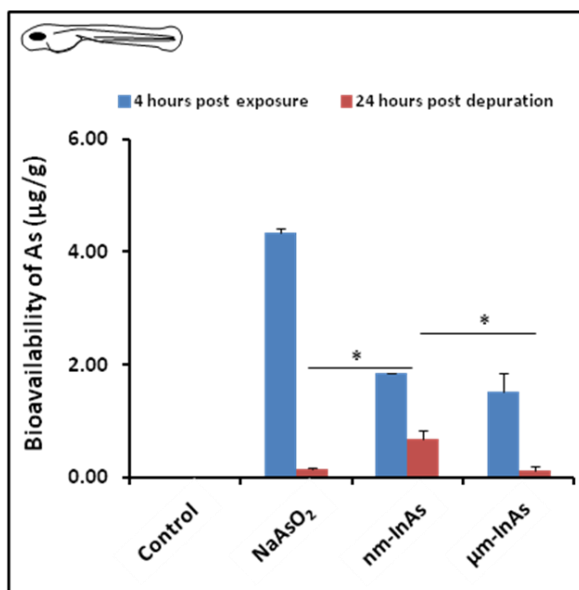

**Figure S7.** ICP-OES analysis to estimate the amount ( $\mu\text{g/g}$ ) of As in the body of the larvae ( $n=60$  for each treatment group) after 4 hour exposure to  $\text{NaAsO}_2$ , nm-InAs and  $\mu\text{m-InAs}$ , as well as repeat of the analysis at  $t= 28$  hr (*i.e.*, 4 hr of exposure plus a 24 hour depuration period). Analysis revealed As retention after the depuration period only for the nm-InAs treatment group. While the  $\text{NaAsO}_2$  group had a higher body content of As after 4 hr of exposure compared to the particulates, the nm-InAs treatment group showed significant ( $*p<0.05$ ) accumulation of As following the 24 hr depuration period.



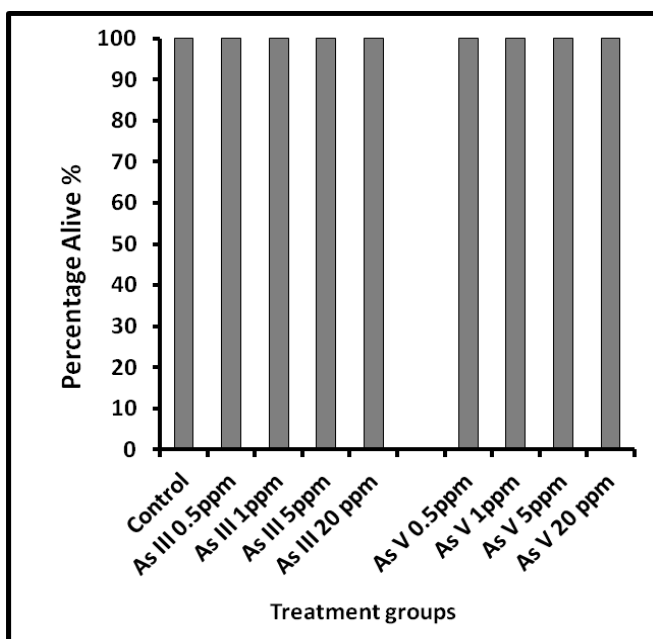

**Figure S8.** Graph to show the dosimetry analysis for the % of live fish ( $n=6$ ) after a 4 day exposure of adults to 0.5, 1, 5, 20 ppm.

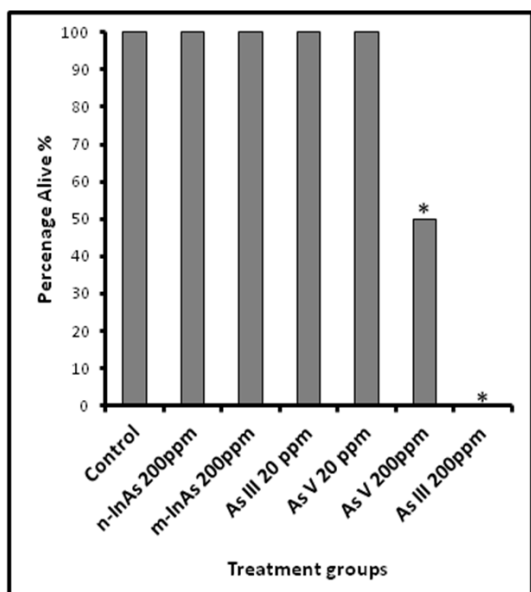

**Figure S9.** Dosimetry analysis, to show the % live fish ( $n=6$ ) per treatment group after a 4 day of adults to 200 ppm nm-InAs,  $\mu$ m-InAs, as well as AsIII/AsV at 20ppm (to mimic the dissolution of As from particulates) and AsIII / AsV at 200ppm.

## References

<sup>1</sup>Meng, X.; Wang, W. In *Speciation of arsenic by disposable cartridges*, Book of posters of the third international conference on arsenic exposure and health effects, Society of Environmental Geochemistry and Health Denver, Colorado: 1998.
